# Supplementary material for: Deletion of TRPC6, an Autism Risk Gene, Induces Hyperexcitability in Cortical Neurons Derived from Human Pluripotent Stem Cells
Source: PubMed Central journal article supplement (PMC10657791; doi:10.1007/s12035-023-03527-0), 2023-08-08

# Supplementary Figure 1

**a**

5'CTGCCCACTCGGCTCCCCCGGGAGCGGGGCCAGGCCAGTCGGGCGTTCCCGCCATGAGCCAGAGCCCGGCGTTCGGGCCCCGGAGGGGCAGTTCTCCCCGG 3'  
 3'GACGGGTGAGCCGAGGGGGCCCTCGCCCCGGTCCGGTCAGCCCGCAAGGGCGGTACTCGGTCTCGGGCCGCAAGCCCGGGGCCTCCCCGTCAAGAGGGGCC 5'  
 CAGCCCGCAAGGGCGGTACT (guide RNA)

**b**

5'CTGCCCACTCGGCTCCCCCGGGAGCGGGGCCAGGCCAGTCGGGCGTTCCCGCCATGAGCCAGAGCCCGGCGTTCGGGCCCCGGAGGGGCAGTTCTCCCCGG 3' (Wild-type)  
 5'CTGCCCACTCGGCTCCCCCGGGAGC-----AGTTCTCCCCGG 3' (TRPC6 KO, C21)  
 5'CTGCCCACTCGGCTCCCCCGGGAGCGGGGCCAG-----GAGGGGCAGTTCTCCCCGG 3' (TRPC6 KO, C47)

**c**

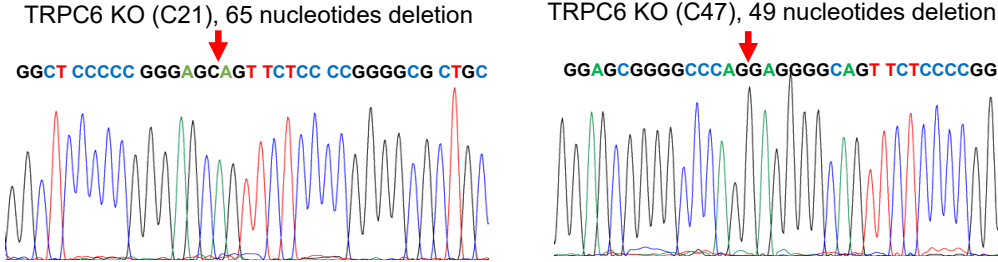

**d**

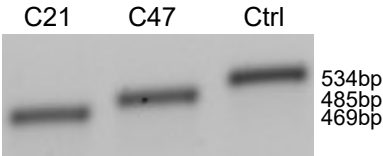

# Supplementary Figure 2

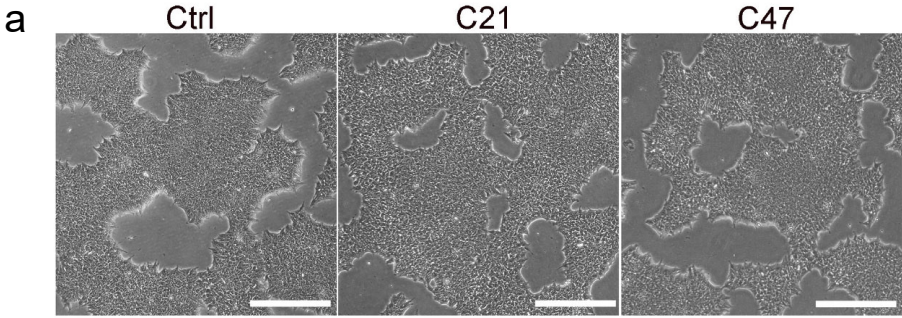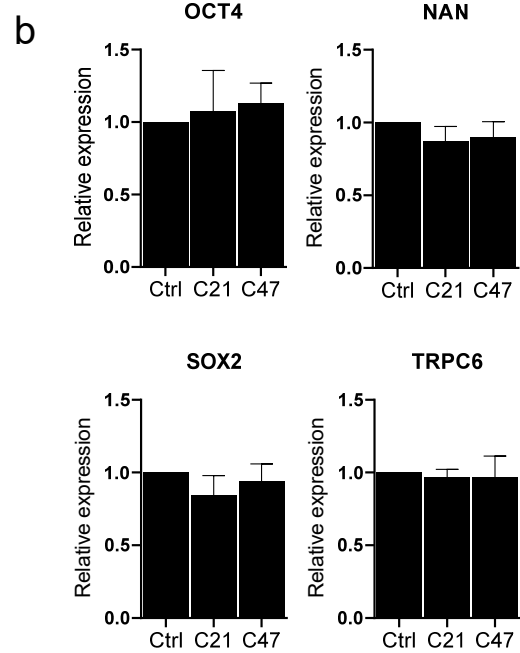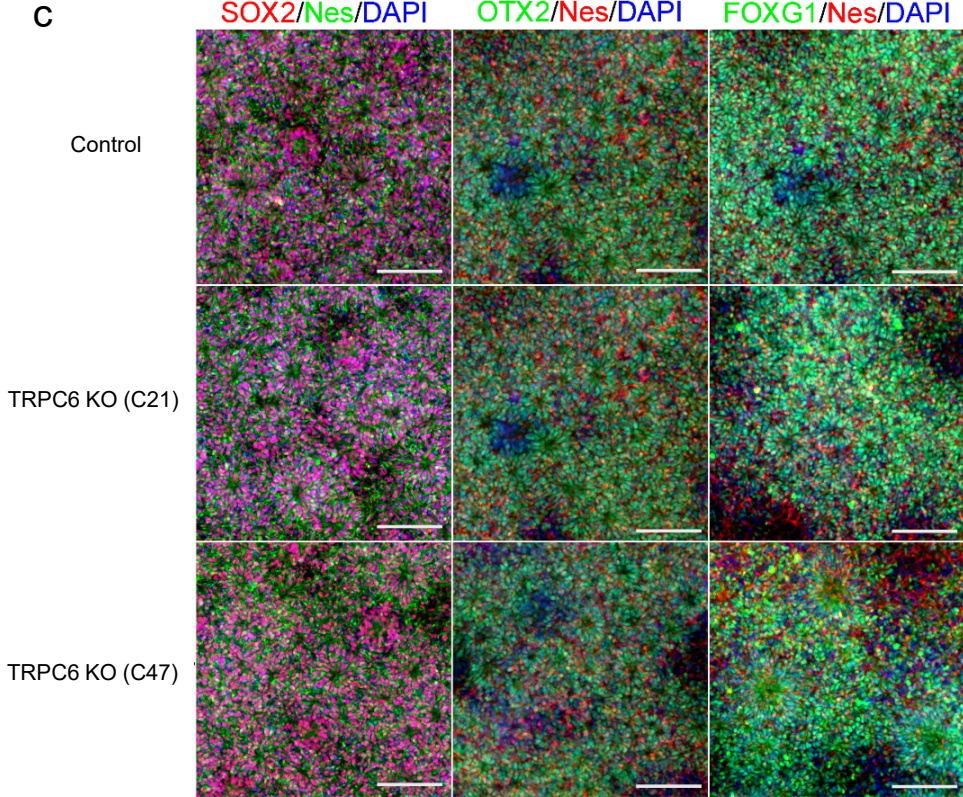

# Supplementary Figure 3

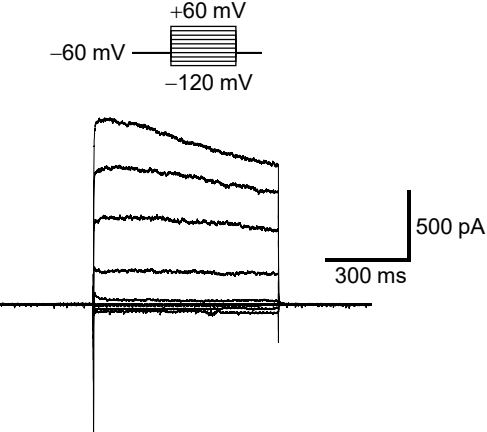

# Supplementary Figure 4

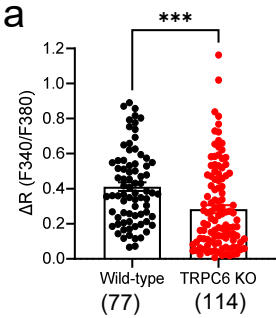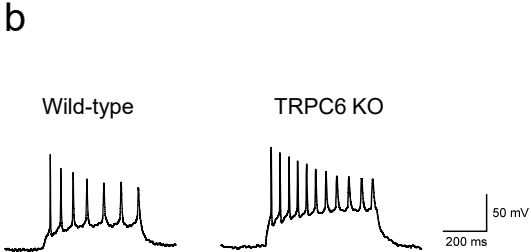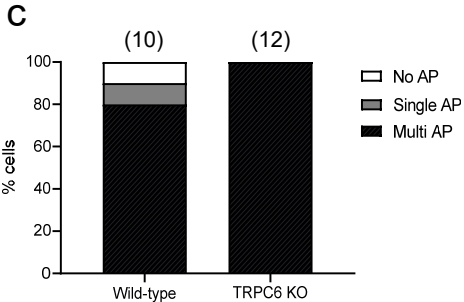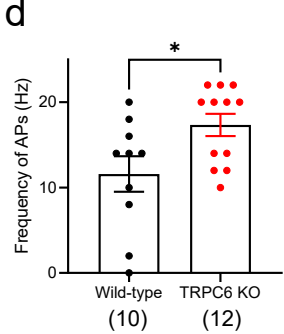

# Supplementary Figure 5

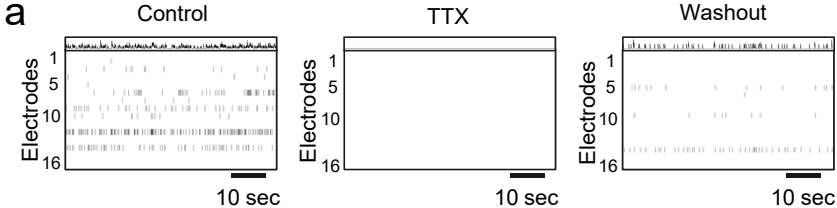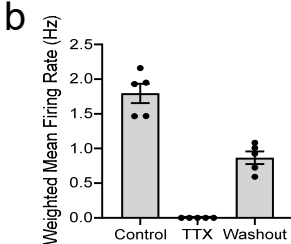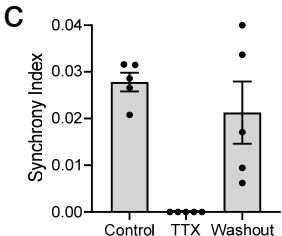

Supplementary Figure 6

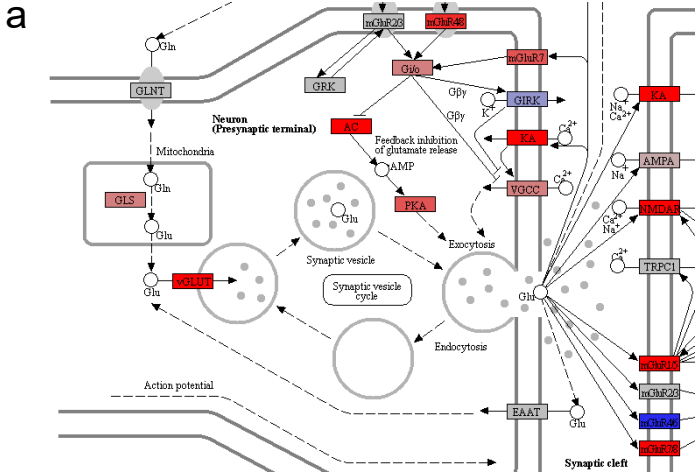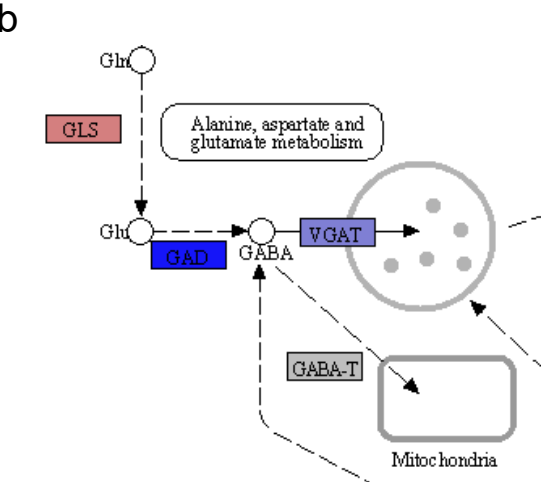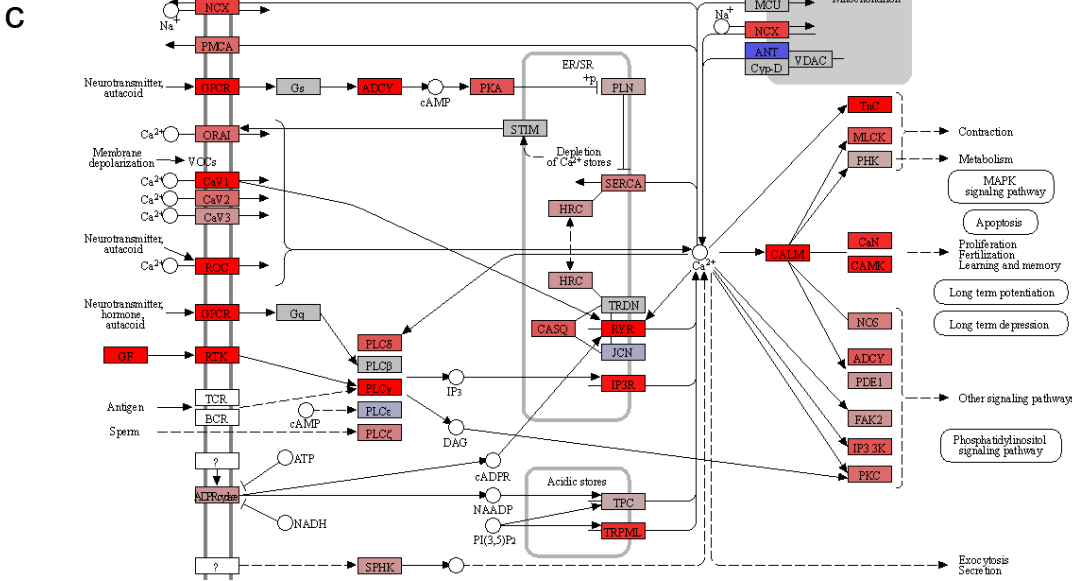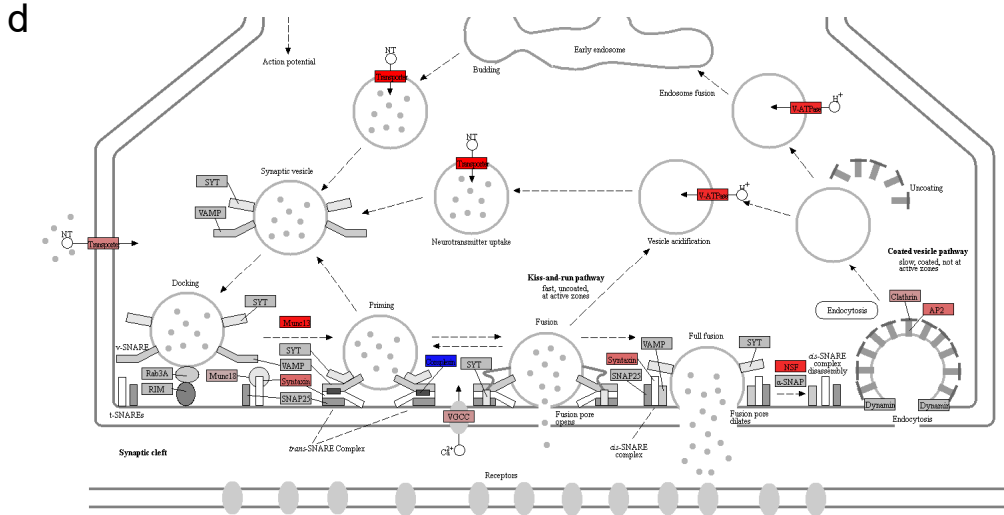

Supplement: 12035_2023_3527_MOESM1_ESM.pdf [file 12035_2023_3527_MOESM1_ESM.pdf]
